# Supplementary material
Source: Springer Nature journal article supplement (https://www.springermedizin.de/resource/supplementary/12960_2003_3_MOESM5_ESM.pdf/9569764)

% of countries in region

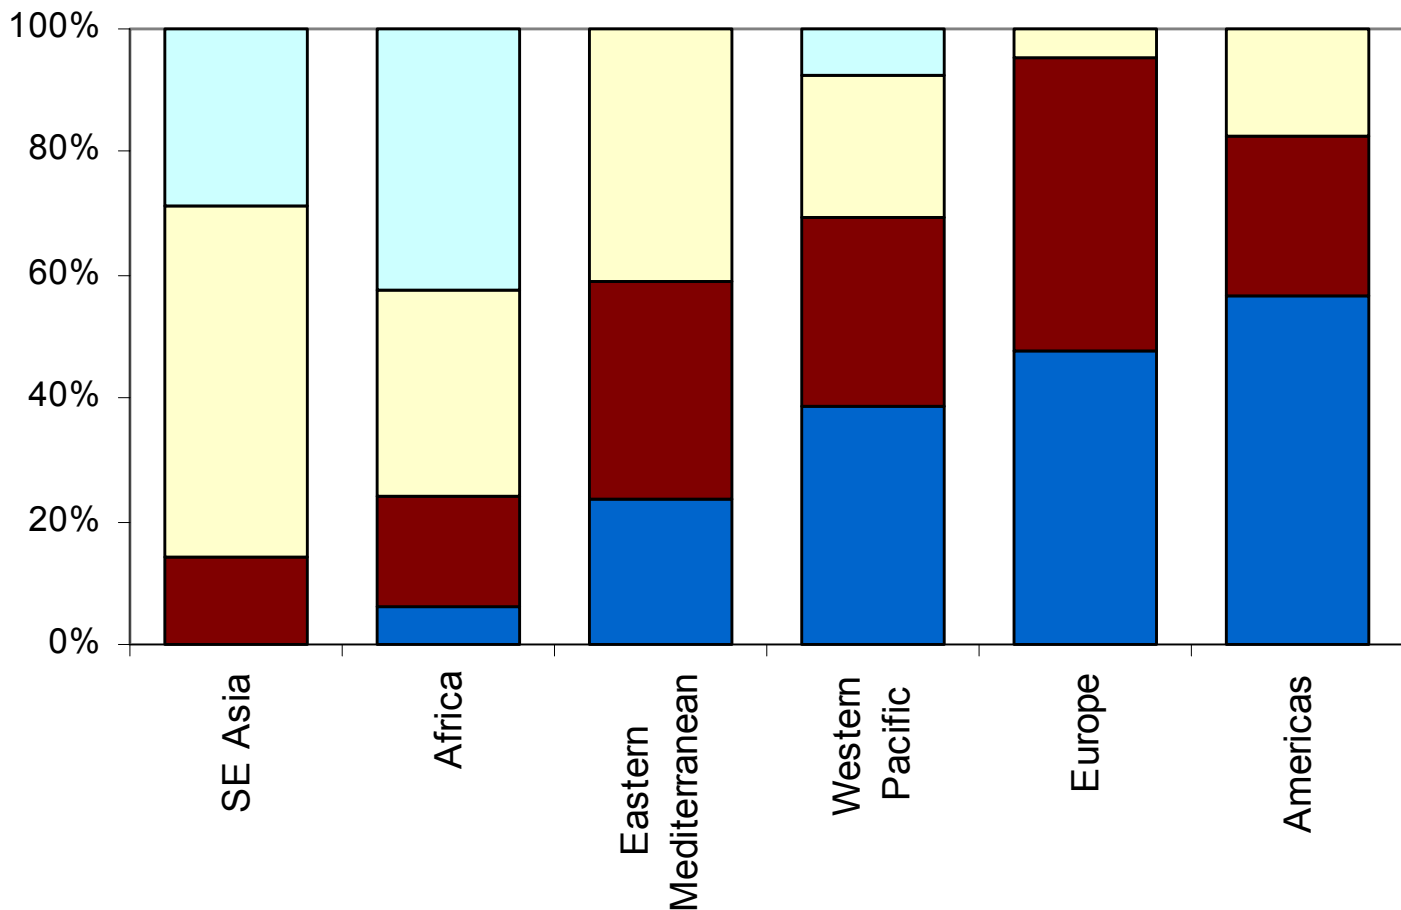

Population (millions) per medical school:

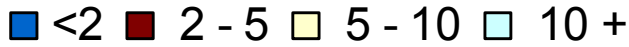

Supplement: MOESM5 [file 9569764]
